# Supplementary material
Source: HighWire-hosted journal article supplement (https://srh.bmj.com/highwire/filestream/141733/field_highwire_adjunct_files/0/bmjsrh-2021-201064supp001_data_supplement.pdf)
Supplement: bmjsrh-2021-201064supp001_data_supplement.pdf [file bmjsrh-2021-201064supp001_data_supplement.pdf]

**Appendix 1: Association of Surgeons in Primary Care (ASPC) Audit form and Vasectomy glossary****ASPC Vasectomy Audit return for 2018-19 (for what would have been Conference 2020)**for vasectomies undertaken between 1<sup>st</sup> April 2018 – 31<sup>st</sup> March 2019

(Please see 'Vasectomy Glossary 2020' page for Definitions of what's required if you're unsure)

**THIS FORM IS FOR YOU TO COLLATE YOUR RESULTS, THEN INPUT THEM INTO THE SURVEYMONKEY LINK**  
**<https://www.surveymonkey.co.uk/r/ASPC-VAS-2020>**

CLINIC NAME .....

OPERATING DOCTOR (S).....

|                                  |           |               |             |
|----------------------------------|-----------|---------------|-------------|
| NUMBER OF VASECTOMIES PERFORMED: | NHS ..... | PRIVATE ..... | TOTAL ..... |
|                                  |           | NUMBER        | PERCENTAGE  |

**1. TESTING FOR STERILITY** in this Audit Cycle?

|                                                                                     |       |       |
|-------------------------------------------------------------------------------------|-------|-------|
| NUMBER and PERCENTAGE of patients <u>confirmed</u> Sterile (inc. Special Clearance) | ..... | ..... |
|-------------------------------------------------------------------------------------|-------|-------|

**2. Special Clearance** given in this Audit Cycle?

|                                                                                |     |    |
|--------------------------------------------------------------------------------|-----|----|
| Do you use 1 or 2 negative tests to confirm sterility (please circle)          | 1   | 2  |
| Did you exclusively use a postal service for this Audit cycle? (Please circle) | YES | NO |

**3. FAILURE OF STERILITY** in this Audit Cycle

|                                                                                                                                                               |       |       |
|---------------------------------------------------------------------------------------------------------------------------------------------------------------|-------|-------|
| a) <b>Early failures</b> (Please see Vasectomy Glossary page for Definition)                                                                                  | ..... | ..... |
| b) <b>Late failures</b> (Please see Vasectomy Glossary page for Definition)                                                                                   | ..... | ..... |
| c) Early/Late failures from Vas's done <b>before</b> 1 <sup>st</sup> April 2018<br>(ie <b>NOT</b> this audit cycle), that have <b>NOT</b> been audited before | ..... | N/A   |

**4. INFECTIONS** (Please see Vasectomy Glossary for Definition)

|                                                            |       |     |
|------------------------------------------------------------|-------|-----|
| Of those, how many antibiotics did Vasectomy Surgeon give? | ..... | N/A |
|------------------------------------------------------------|-------|-----|

**5. HAEMATOMAS** (Please see Vasectomy Glossary for Definition)

|                          |       |       |
|--------------------------|-------|-------|
| How many > Cricket ball? | ..... | ..... |
|--------------------------|-------|-------|

I **DO NOT** want to count complications twice if the **SAME** patient had **BOTH** Infection AND Haematoma (see online for explanation)  
 So... how many patients who were given Antibiotics (Q4) also had a Haematoma (Q5)? .....

**6. POST-VASECOMY PAIN SYNDROME** (Please see Vasectomy Glossary for Definition)

|                                                     |       |     |
|-----------------------------------------------------|-------|-----|
| a) From patients from this audit cycle              | ..... | N/A |
| b) From patients NOT in this audit cycle            | ..... | N/A |
| c) What treatments have they tried? (Answer online) |       |     |
| d) Are they still suffering? (Re-contact them!)     |       |     |

|                                                   |     |    |
|---------------------------------------------------|-----|----|
| <b>7. ANY HOSPITAL ADMISSIONS POST VASECTOMY?</b> | YES | NO |
|---------------------------------------------------|-----|----|

If yes, how many, and what happened? (Answer online)

**8. COSTS**

|                                                                                                                         |             |                 |
|-------------------------------------------------------------------------------------------------------------------------|-------------|-----------------|
| Tariff Cost per case?                                                                                                   | NHS £ ..... | PRIVATE £ ..... |
| Do you pay for the NHS sperm tests out of your Gross cost?                                                              | YES         | NO              |
| If yes – how much per sperm test?                                                                                       | £.....      |                 |
| <b>Do you do routinely use LIVE tests for routine testing (ie not just for Special Clearance)</b>                       | YES         | NO              |
| <b>If you have to undertake a LIVE test (for say Special Clearance) what is the cost?</b>                               | £.....      |                 |
| If you are paid a fee for each Vasectomy (with no overheads) undertaken by a company, what average do you get per case? | £.....      |                 |

**9. PEER REVIEWS**

|                                                                                      |     |        |
|--------------------------------------------------------------------------------------|-----|--------|
| Have you been peer reviewed in the last 3 years?                                     | YES | NO     |
| <b>If so who by?</b> (Answer online)                                                 |     |        |
| Did your GP Appraiser undertake a Vasectomy appraisal during your last GP appraisal? | YES | NO     |
| Are you a Vas trainer?                                                               | YES | NO     |
| If Yes: Are you on the FSRH list of approved Vasectomy trainers?                     | YES | Unsure |
| If not would you be interested in becoming a Trainer?                                | YES | NO     |

**10. QUESTIONNAIRES**

|                                                                              |            |                 |           |
|------------------------------------------------------------------------------|------------|-----------------|-----------|
| Did you use the APSC <i>immediate post op</i> questionnaires for this audit? | <b>YES</b> | <b>PARTLY</b>   | <b>NO</b> |
| Did you use the APSC <i>4 month post op</i> questionnaires for this audit?   | <b>YES</b> | <b>PARTLY</b>   | <b>NO</b> |
| Are you planning to use the ASPC Vasectomy Audits for the 2020/21 cycle?     | <b>YES</b> | <b>NOT SURE</b> | <b>NO</b> |

**If you want to start compiling your results online, give me some details and I'll get you set up**

**QUESTIONNAIRE RESULTS for vasectomies undertaken between 1<sup>st</sup> April 2018 – 31<sup>st</sup> March 2019**

| <b>For those using ASPC Immediate Post op Form</b>                                                      | <b>Number</b> | <b>Percentage</b> |
|---------------------------------------------------------------------------------------------------------|---------------|-------------------|
| What number and therefore what percentage of questionnaire returns did you achieve in this Audit Cycle? | .....         | .....             |
| What number + percentage said NO to: Q1 (booking appointment)                                           | .....         | .....             |
| What number + percentage said VERY GOOD to Q2 (info sheet)                                              | .....         | .....             |
| What number + percentage said VERY USEFUL or FAIRLY USEFUL to Q3 (pre vas consult)                      | .....         | .....             |
| What number + percentage said COMPLETELY AT EASE or VERY COMFORTABLE Q4 (op location)                   | .....         | .....             |
| What number + percentage said EXCELLENT or VERY GOOD to Q5 (premises)                                   | .....         | .....             |
| What number + percentage said EXCELLENT or VERY GOOD to Q6 (Dr's manner)                                | .....         | .....             |
| What numbers + percentages said to Q7 (rate the pain of vasectomy)                                      |               |                   |
| i) no pain                                                                                              | .....         | .....             |
| ii) some discomfort                                                                                     | .....         | .....             |
| iii) both above added together                                                                          | .....         | .....             |
| What number + percentage said EXCELLENT or VERY GOOD to Q8 (overall impression)                         | .....         | .....             |
| What number + percentage said VERY LIKELY to Friends & Family                                           | .....         | .....             |

**Please free to add any feedback or suggested alterations to the questionnaires online**

**QUESTIONNAIRE RESULTS for vasectomies undertaken between 1<sup>st</sup> April 2018 – 31<sup>st</sup> March 2019****For those using ASPC 4 Month Post op Form**

|                                                                                                         |       |       |
|---------------------------------------------------------------------------------------------------------|-------|-------|
| What number and therefore what percentage of questionnaire returns did you achieve in this Audit Cycle? | ..... | ..... |
| What numbers + percentages for Q2: Rate the pain you felt after your Vasectomy                          |       |       |
| No Pain                                                                                                 | ..... | ..... |
| Slight Discomfort                                                                                       | ..... | ..... |
| Slightly Painful                                                                                        | ..... | ..... |
| Painful                                                                                                 | ..... | ..... |
| Very Painful                                                                                            | ..... | ..... |
| What number + percentage said YES to Q3. Pain for over a week?                                          | ..... | ..... |
| And what was the average time (in days) for pain to resolve                                             | ..... | ..... |
| What number + percentage said YES to Q4. Ache/Discomfort for over 2 weeks?                              | ..... | ..... |
| And what was the average time (in days) for the Ache/Discomfort to resolve                              | ..... | ..... |
| What number + percentage said VERY GOOD or FAIRLY GOOD to Q7 ( <i>Adequate post-op sheet info?</i> )    | ..... | ..... |
| What number + percentage said YES to Q9 ( <i>more time off work than you anticipated?</i> )             | ..... | ..... |
| And was the average they had expected to stay off?                                                      | ..... | ..... |
| And what was the average of how many days it took them to return to work?                               | ..... | ..... |
| What was the difference?                                                                                | ..... | ..... |
| What number + percentage said EXCELLENT or VERY GOOD to Q11 ( <i>overall satisfaction</i> )             | ..... | ..... |

**Please see the additional questions online to decide if we should remove some questions from the 4Month questionnaire**

|                                                                                      |         |            |         |
|--------------------------------------------------------------------------------------|---------|------------|---------|
| Have you had your NHS funding for vasectomies removed or threatened in the last 12m? | Removed | Threatened | Neither |
|--------------------------------------------------------------------------------------|---------|------------|---------|

Do you have any odd/interesting stories do you have to tell relating to your Vas surgery sessions? Or how about those moments that have scared you operating (the brown trouser moments). Please only tell us ONLINE those stories/moments that you haven't contributed to before to the ASPC

**Please tell us ONLINE what you have learned in the last year that has significantly changed/improved/alterd your practice?**

**Signature..... Name (print)..... Date .....**

**Please DO NOT return THIS PAPER VERSION to me, but keep for own Appraisal**

**Please use the SurveyMonkey Link above (& sent to you via email) and input your own answers – I WILL NOT DO IT FOR YOU!!**

You will get a month's warning to the **AUDIT CLOSING date**, once Covid has calmed down..... watch out for that email!

At that stage, with no ASPC Conference this year, I will then sort out the results, and I will email out to everyone a print out (as usual) for those who have participated for your PDP.

More than 1 years data? – that's fine, see letter for your choices as to how to add...

Reminder we also run **ASPC authorised Carpel Tunnel and Skin Surgery questionnaires** - email me for details

Keep safe and hope to see you all healthy and over Covid in 2021

**Any questions Email me: Dr Gareth James: GtbVas@Yahoo.co.uk**

GJJ 4/20

# Vasectomy Definition Glossary 2020

(Relating to Audit collection)

These definitions were drafted by a mixture of members of the ASPC, plus Professor Labrecque, Canada, and ratified during ASPC conferences then updated using the 2014 FSRH guidelines

| Term                                      | Meaning                                                                                                                                                                                                                                                                                                                                                                                                                                                                                                                                  |
|-------------------------------------------|------------------------------------------------------------------------------------------------------------------------------------------------------------------------------------------------------------------------------------------------------------------------------------------------------------------------------------------------------------------------------------------------------------------------------------------------------------------------------------------------------------------------------------------|
| <b>This Audit Cycle (TAC)</b>             | Data collected from Vasectomies that were undertaken between 1 <sup>st</sup> April 2018 until 31 <sup>st</sup> March 2019 inclusive                                                                                                                                                                                                                                                                                                                                                                                                      |
| <b>Not this Audit Cycle (NTAC)</b>        | Data/information collected since the last conference data pertaining to Vasectomies that were undertaken <b>before</b> 1 <sup>st</sup> April 2018 (i.e. late failures/PVPS)                                                                                                                                                                                                                                                                                                                                                              |
| <b>Sterility</b>                          | This is when Post-vasectomy semen analysis (PVSA) arranged after the appropriate time show either <b>NO SPERM</b> in the ejaculate or when the patient has achieved Special Clearance, and consequently the patient can be informed it is safe to abandon any other contraception.                                                                                                                                                                                                                                                       |
| <b>Early Failure</b>                      | 2014 FSRH guidelines state Early Failure has occurred if any <b>MOTILE</b> sperm are observed in a Fresh sample 7 months post vasectomy.<br>The patient is informed that the vasectomy has been deemed as unsuccessful, meaning either contraception for life or requiring a second operation.<br>It does <b>NOT</b> mean those who are still undergoing further sperm tests, nor does it mean those who ultimately achieve Special Clearance.<br><i>Perceived ASPC rate from Audit as being about 1 in 200 procedures</i>               |
| <b>Late Failure</b>                       | This is a failure <b>AFTER</b> you have informed the patient that they had a negative PVSA and were sterile, and safe to abandon any contraception; irrespective of time frame.<br>Usually uncovered with a pregnancy, though could be found on the reappearance of motile spermatozoa following confirmation of sterility at PVSA<br>This is due to a late reconnection of the vas deferens.<br><i>Perceived ASPC rate from Audit as being about 1 in 2000</i>                                                                          |
| <b>Special Clearance (SC)</b>             | According to the 2014 FSRH guidelines Special Clearance is achieved/given if less than 100,000/ml non-motile (i.e.: DEAD) sperm are seen in a <b>FRESH</b> [usually less than 1 hour old] sample arranged after the appropriate time post vasectomy.<br><br>There is no evidence to say that those given SC have any higher rates of Late Failures than someone who achieves full sterility without given SC.                                                                                                                            |
| <b>Haematoma</b>                          | This is a <b>PAINFUL</b> swelling of a certain size (roughly a golf ball and larger) that develops in the scrotal sac resulting from the Vasectomy.<br>The ASPC direct the patient to define a haematoma as any swelling the same size (or greater) as their own testicle<br>This is due to collection of blood around the sheath                                                                                                                                                                                                        |
| <b>Post op Infection</b>                  | Any case where <b>ANY</b> clinician has deemed it appropriate to give antibiotics for a presumptive Post Vasectomy Infection (whether the clinician was right or wrong!)                                                                                                                                                                                                                                                                                                                                                                 |
| <b>Minimally Invasive Vasectomy (MIV)</b> | MIV terminology is used to encompass the very prescriptive Non Scalpel Vasectomy (and all other modified versions of this technique) where the skin opening is ≤10 mm, the dissection area surrounding the vas deferens is minimised and skin sutures are not required.<br>MIV may include the use of a variety of surgical instruments, including a scalpel, to expose the vas. MIV techniques have been shown to reduce the level of bleeding and intra-operative pain, quicker recovery period with less post operative complications |
| <b>Chronic Post Vasectomy Pain (PVP)</b>  | This is defined as chronic and sometimes debilitating scrotal pain (severe enough to cause the patient to seek medical attention and/or to interfere with quality of life) occurring any time after the surgery and persisting for more than six months despite non-surgical treatments.<br><i>Perceived rate for ASPC members of about 1 in 400, though figures as high as 15% have been quoted on line and in journals.</i>                                                                                                            |
| <b>Single test regimen</b>                | The FSRH 2014 suggest 12 weeks post vasectomy is optimal timing for the first PVSA, though the current ASPC recommended interval is at, or after, 16 weeks.<br>A routine second PVSA is not required if azoospermia found in the first sample.<br>Postal PVSA is acceptable, but such samples will not be suitable for the assessment of sperm motility                                                                                                                                                                                  |

© ASPC GJJ 4/20
